# Supplementary material
Source: HighWire-hosted journal article supplement (http://asnr-client.stage.highwire.org/highwire/filestream/182007/field_highwire_adjunct_files/0/14-00406.pdf)

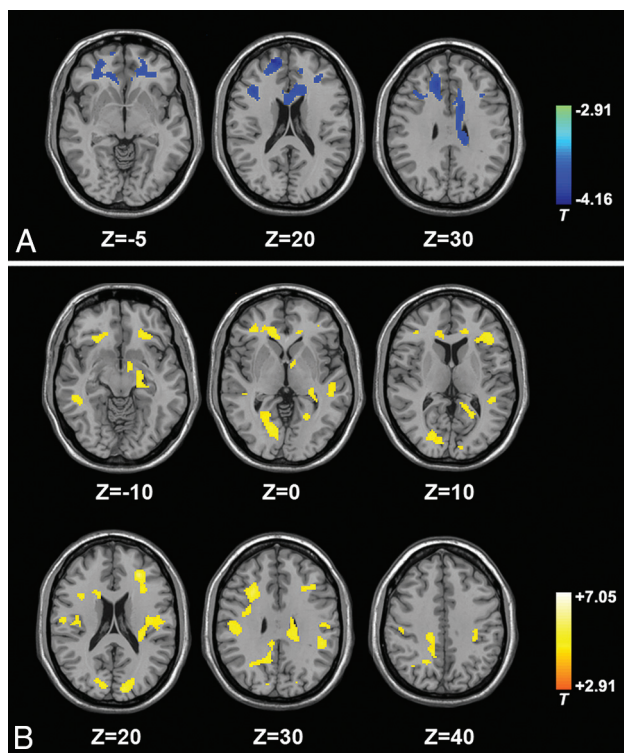

**ON-LINE FIGURE.** White matter regions with increased MD (A) and decreased FA (B) in patients with MHE.

Supplement: 14-00406.pdf [file 14-00406.pdf]
